# Supplementary material
Source: publisher figshare collection journal article supplement (https://frontiersin.figshare.com/ndownloader/files/24339185)
Supplement: Supplementary file [file 24339185]

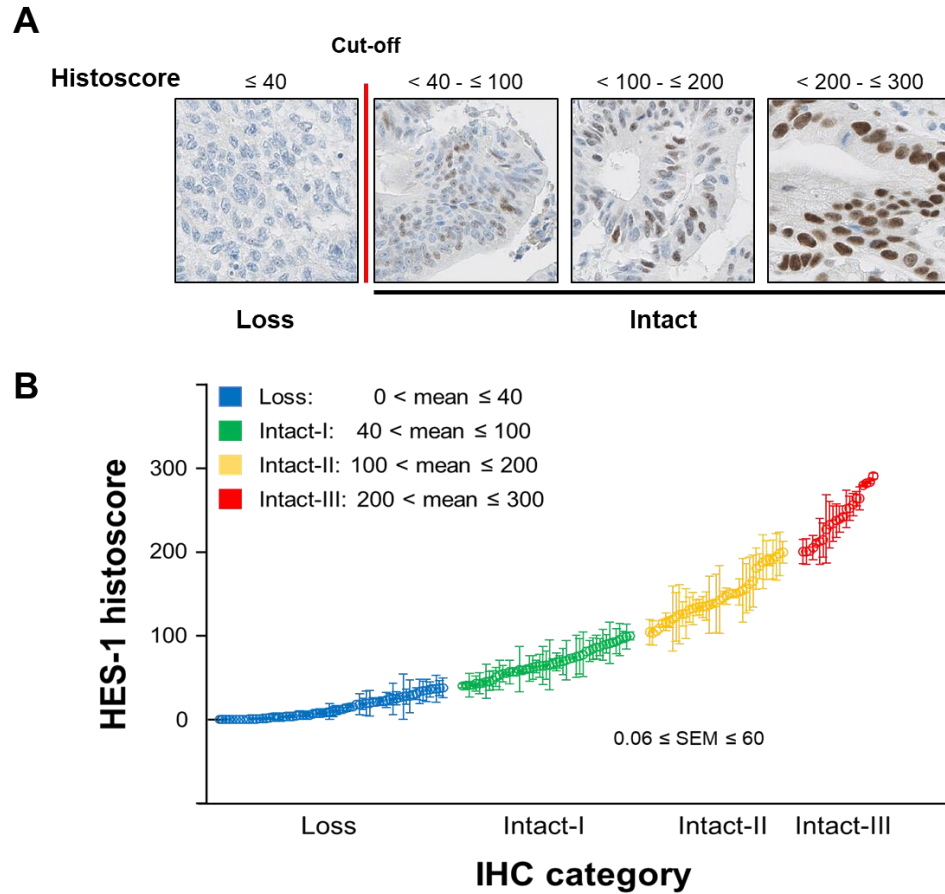

**Supplementary Figure S1.** HES-1 expression in small intestinal adenocarcinomas. **(A)** Representative staining images were displayed based on histoscore category. **(B)** There was no significant intra-tumor heterogeneity in small intestinal adenocarcinomas. Data represent the mean ± SEM.

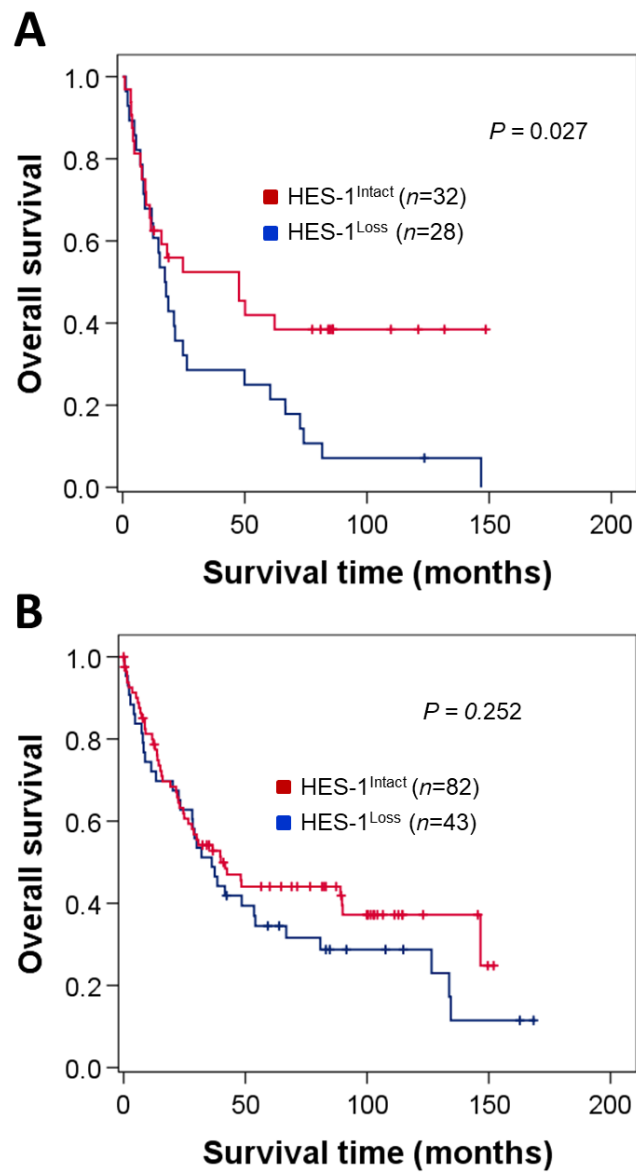

**Supplementary Figure S2.** Survival analysis of patients with small intestinal adenocarcinomas according to *KRAS* genotypes. (A) In the  $KRAS^{MT}$  group, patients with HES-1<sup>Loss</sup> (median, 17.3 months; OS rate, 3.6%)

had worse OS than those with HES-1<sup>Intact</sup> (47.6 months; 40.6%) ( $P = 0.027$ ), whereas **(B)** there was no significant survival difference in the  $KRAS^{WT}$  group based on the HES-1 expression status ( $P = 0.252$ ).
